# Supplementary material for: Housing Conditions Affect Adult Zebrafish (Danio rerio) Behavior but Not Their Physiological Status
Source: MDPI journal article supplement (doi:10.3390/ani13061120), 2023-03-22
Supplement: s1 [file s1]

**Table S1.** Significant data ( $p < 0.05$ ) of the random factor batch from the novel tank test that are not represented in the text or figure. There were no interactions with the fixed factor treatment.

| Variable of the NT                                         | Factor | Description            | Statistic test             | $p$ -value | Statistical test value <sup>1</sup> | Median [IQR] or Mean $\pm$ SD                          |
|------------------------------------------------------------|--------|------------------------|----------------------------|------------|-------------------------------------|--------------------------------------------------------|
| Distance (m)                                               | Batch  | First vs. Second batch | Univariate analysis        | 0.004      | $Z = 27424.420$                     | First: $20.24 \pm 3.61$<br>Second: $13.78 \pm 1.82$    |
| Average speed (m/s)                                        | Batch  | First vs. Second batch | Univariate analysis        | 0.010      | $Z = 4447.864$                      | First: $0.06 \pm 0.01$<br>Second: $0.04 \pm 0.01$      |
| Distance (m) during erratic movements                      | Batch  | First vs. Second batch | Univariate analysis        | 0.026      | $Z = 603.722$                       | First: $14.75 \pm 3.06$<br>Second: $4.31 \pm 1.98$     |
| Duration (s) of the erratic movements                      | Batch  | First vs. Second batch | Univariate analysis        | 0.037      | $Z = 296.714$                       | First: $170.83 \pm 39.10$<br>Second: $67.65 \pm 24.57$ |
| Distance (m) swam in the BTM zone                          | Batch  | First vs. Second batch | Univariate analysis        | 0.043      | $Z = 221.917$                       | First: $17.43 \pm 2.01$<br>Second: $7.46 \pm 1.06$     |
| Average speed (m/s) of enriched-housed fish in the UP zone | Batch  | First vs. Second batch | Independent Samples T Test | 0.022      | $t(3) = 4.418$                      | First: $0.08 \pm 0.004$<br>Second: $0.04 \pm 0.007$    |

<sup>1</sup> For Independent Samples t-test  $t(df) = t$  value. For Univariate analysis, presented is the standard score ( $Z$ ); UP (upper) and BTM (bottom) zones of the tank; NT: Novel tank test.
