# Supplementary material for: Housing Conditions Affect Adult Zebrafish (Danio rerio) Behavior but Not Their Physiological Status
Source: Animals (Basel). 2023 Mar 22;13(6):1120. doi: 10.3390/ani13061120 (PMC10044285; doi:10.3390/ani13061120)
Supplement: Supplementary file 1 [file animals-13-01120-s001.zip]

Archive with 5 entries (5 files):
- Figure S1.jpg
- Figure S2.jpg
- Raw data_Animals paper.xlsx
- TableS1.pdf
- VideoS1.avi
