# Supplementary material for: Housing Conditions Affect Adult Zebrafish (Danio rerio) Behavior but Not Their Physiological Status
Source: Animals (Basel). 2023 Mar 22;13(6):1120. doi: 10.3390/ani13061120 (PMC10044285; doi:10.3390/ani13061120)
Supplement: Supplementary file 1 [file animals-13-01120-s001.zip › Raw data_Animals paper.xlsx]

## Sheet: Body Length
Tank	Standard Length (cm)	Housing
1	3.99725	Enriched
2	3.56175
3	3.50971
4	2.96313
5	3.34062
1	3.39525	Barren
2	2.84888
3	3.09
4	3.0465
5	2.8335

## Sheet: Cortisol
Housing	Tank	Matrix	Cortisol (pg/mg protein)
Enriched	1	Skin mucus	0.68
	2		0.81
	3		0.29
	4		0.42
	5		0.32
Barren	1		0.78
	2		0.92
	3		0.42
	4		0.37
	5		0.3
Enriched	1	Whole-body	0.35
	2		0.43
	3		1.18
	4		0.54
	5		0.89
Barren	1		0.34
	2		0.58
	3		0.81
	4		1.33
	5		1.07

## Sheet: Oxidative stress
Housing	Activity	Value
Barren	SOD	425.42
		347.74
		384.38
		496.79
		662.22
Enriched		604.51
		225.53
		627.77
		341.32
		577.77
Barren	CAT	85.9
		86.64
		100.83
		198.75
		206.68
Enriched		378.78
		93.87
		160.83
		126.83
		132.89
Barren	GPx	2.16
		3.27
		2.99
		3.47
		6.93
Enriched		9.56
		5.17
		6.89
		4.26
		2.76
Barren	GR	1.61
		1.4
		3.36
		8.82
		7.12
Enriched		15.67
		5.6
		3.25
		7.6
		4.87
Barren	GST	21.03
		61.93
		42.16
		114.05
		81.77
Enriched		191.41
		101.36
		70.32
		60.47
		88.33
Barren	GSH	197.69
		569.79
		206
		565.24
		480.21
Enriched		1726.47
		625.19
		826.26
		701.22
		472.57
Barren	GSSG	80.62
		137.18
		119.06
		144.27
		136.24
Enriched		510.66
		42.87
		307.9
		207.99
		235.64
Barren	OSI	2.45
		4.15
		1.73
		3.92
		3.53
Enriched		3.38
		14.58
		2.68
		3.37
		2.01
Barren	TBARS	132.91
		135.85
		87.37
		151.76
		87.58
Enriched		121.74
		80.19
		143.8
		151.21
		182.91
Barren	Carbonyls	2.62
		10.32
		7.29
		8.27
		1.88
Enriched		4.67
		1.87
		0.96
		2.8
		1.44
Barren	AcHE	4.87
		12.66
		26.39
		34.69
		34.45
Enriched		91.14
		32.89
		33.06
		16.25
		10.84
Barren	LDH	7.54
		65.57
		13.4
		17.28
		76.52
Enriched		51.87
		19.81
		93.2
		49.43
		32.32
Barren	ROS	0.66
		1.01
		1.01
		1.69
		2.14
Enriched		3.75
		1.5
		2.17
		1.57
		1.93

## Sheet: Novel tank
Housing	Tank	Distance	Mean speed	Max speed	Angular velocity	Number of Erratic movements	Duration of erratic movements	Distance during erratic movements	Immobile episodes	Immobile Time	Entries UP	Time UP	Distance UP	Speed UP	Immobile time_UP	Immobile ep_UP	Entries BTM	Time BTM	Distance BTM	Latency_1st entry_BTM	Latency 1st exit_BTM	Speed BTM	Immobile time BTM	Immobile ep_BTM
Barren	1	20.89	0.06	0.84	130.2	58.8	153.44	13.22	2	10.28	14.6	62.04	3.95	0.08	3.12	0.4	14.4	297.96	16.94	1.4	98.66	0.06	7.16	1.6
	2	22.45	0.06	0.38	132.5	54	201.7	17.25	4.75	41.58	24.5	36.65	2.93	0.07	0	0	24.25	323.35	19.52	1.4	113.05	0.06	41.58	4.75
	3	13.94	0.04	0.14	104.2	47.2	52.8	2.93	0.2	23.28	22	146.04	6.4	0.04	0	0	21.6	213.96	7.54	2.28	6	0.04	23.28	0.2
	4	16.12	0.04	0.21	105.4	46.4	101.36	7.48	1.8	27.14	27.6	162.82	7.75	0.05	2.96	1.4	27.2	197.18	8.37	8.89	13.43	0.05	24.18	0.8
	5	15.69	0.04	0.25	141	65	86.98	5.25	0	0	38.2	204.34	8.83	0.04	0	0	37.6	155.66	6.86	5.54	11.32	0.04	0	0
EE	1	22.66	0.06	0.42	140.4	66.6	204.34	17.35	4.2	23.54	24.8	96.34	4.27	0.08	18.46	2.6	24.2	263.66	18.4	0.92	64.2	0.06	5.08	1.6
	2	14.95	0.04	0.4	118.8	45	123.84	11.18	3.6	147.5	1.8	1.42	0.08	0.09	0	0	1.8	358.58	14.87	1.22	232.34	0.04	147.5	3.6
	3	12.7	0.04	0.18	92.4	45.4	78.02	5.07	3.2	44.7	16.6	76.8	4.34	0.06	0	0	16.4	283.2	8.37	1.18	61.46	0.03	44.7	3.2
	4	12.7	0.04	0.22	108.8	35.8	44.24	2.62	0.8	1.88	23.2	188.92	7.05	0.04	0	0	23.2	171.08	5.64	6.3	15.64	0.04	1.88	0.8
	5	11.51	0.03	0.16	119.6	33.2	42.5	2.49	0.8	3.12	22.2	94.86	3.53	0.04	0	0	22	265.14	7.98	2.61	13.79	0.03	3.12	0.8

## Sheet: WB box
Housing	Tank	Entries white	Time white	Distance white	Speed white	Time immobile_white	Immobile ep white	Entries black	Time black	Latency to 1st enter_black	Latency to 1st exit_black
Barren	1	24.2	65.96	2.07	0.03	4.9	0.4	24.2	354.04	12.36	82.83
	2	30	219.26	4.02	0.03	98.58	7	28.4	200.58	51.74	67.94
	3	16.4	83.42	1.8	0.02	20.44	1.4	16.6	336.58	12.25	42.02
	4	29	110.3	3.04	0.03	4.7	0.4	29	309.7	19.56	54.54
	5	26.6	161.06	4.24	0.03	28.44	2.6	26.2	258.94	32	48.45
EE	1	37.4	68.78	2.57	0.03	2.8	0.2	37.2	351.22	3.08	77.42
	2	18.6	82.18	1.51	0.05	42.62	2.4	18.6	337.82	11.78	39.6
	3	14	91.66	1.8	0.03	13.94	0.2	14	328.34	27.38	194.06
	4	22.6	136.28	2.56	0.02	7.34	0.8	22.2	283.72	12.34	31.54
	5	27.6	107.52	2.62	0.03	14.76	1.4	27.4	312.48	8.5	28.18

## Sheet: Shoaling
Housing	Inter-fish distance	Farthest distance	Nearest distance
Barren	8.85	15.86	0.7
	8.58	15.72	0.54
	7.48	13.77	0.55
	9.43	16.93	0.62
	6.51	12.17	0.68
Enriched	7.21	13.12	0.69
	9.01	16.2	1.04
	8.5	15.22	0.77
	7.95	14.21	1.19
	7.29	13.54	0.7
